# Supplementary material for: Impact of Bacterial Cellulose Nanocrystals-Gelatin/Cinnamon Essential Oil Emulsion Coatings on the Quality Attributes of ‘Red Delicious’ Apples
Source: MDPI journal article supplement (doi:10.3390/coatings12060741), 2022-05-28
Supplement: s1 [file s1]

# Supplementary Materials: Impact of Bacterial Cellulose Nano-crystals-Gelatin/Cinnamon Essential Oil Emulsion Coatings on the Quality Attributes of ‘Red Delicious’ Apples

Mahsa Sadat Razavi <sup>1</sup>, Abdollah Golmohammadi <sup>1,\*</sup>, Ali Nematollahzadeh <sup>2</sup>, Alireza Ghanbari <sup>3</sup>, Mahdi Davari <sup>4</sup>, Cesare Rovera <sup>5</sup>, Daniele Carullo <sup>5</sup> and Stefano Farris <sup>5,\*</sup>

<sup>1</sup> Department of Biosystems Engineering, University of Mohaghegh Ardabili, Daneshgah Street, Ardabil 56199-11367, Iran; mahsarazavi.68@gmail.com

<sup>2</sup> Department of Chemical Engineering, University of Mohaghegh Ardabili, Daneshgah Street, Ardabil 56199-11367, Iran; nematollahzadeha@uma.ac.ir

<sup>3</sup> Department of Horticulture, University of Mohaghegh Ardabili, Daneshgah Street, Ardabil 56199-11367, Iran; ghanbari66@uma.ac.ir

<sup>4</sup> Department of Plant Protection, University of Mohaghegh Ardabili, Daneshgah Street, Ardabil 56199-11367, Iran; mdavari@uma.ac.ir

<sup>5</sup> DeFENS, Department of Food, Environmental and Nutritional Sciences, Food Packaging Lab, University of Milan, Via Celoria 2—I-20133 Milan, Italy; cesare.rovera@unimi.it (C.R.); danielle.carullo@unimi.it (D.C.)

\* Correspondence: golmohammdi1342@gmail.com (A.G.); stefano.farris@unimi.it (S.F.); Tel.: +98-04515517500 (A.G.); +39-0250316805 (S.F.); Fax: +98-04515520567 (A.G.); +39-0250316672 (S.F.)

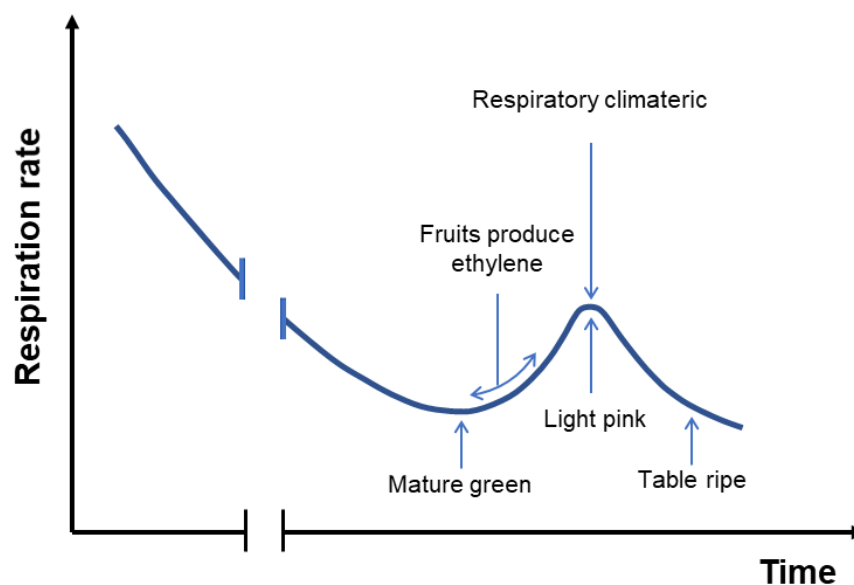

**Figure S1.** Typical ripening pattern for climacteric fruits showing the relative rate of respiration over time (adapted from [1]).

## References

1. Valente, J.; Almeida, R.; Kooistra, L. A Comprehensive Study of the Potential Application of Flying Ethylene-Sensitive Sensors for Ripeness Detection in Apple Orchards. *Sensors* **2019**, *19*, 372. <https://doi.org/10.3390/s19020372>
